# Supplementary material for: Structure modulation of g-C3N4in TiO2{001}/g-C3N4hetero-structures for boosting photocatalytic hydrogen evolution
Source: Royal Society of Chemistry journal article supplement (doi:10.1039/d1ra07691d), 2021-01-01
Supplement: d1ra07691d1.pdf [file d1ra07691d1.pdf]

1                                    **Supplementary data for**  
2        **Structure modulation of g-C<sub>3</sub>N<sub>4</sub> in the TiO<sub>2</sub>{001}/g-C<sub>3</sub>N<sub>4</sub>**  
3        **hetero-structures for boosting photocatalytic hydrogen**  
4                                    **evolution**

5            Qianqian Shang<sup>a</sup>, Yuzhen Fang<sup>a</sup>, Xingliang Yin<sup>a</sup> and Xiangjin Kong<sup>a\*</sup>.

6    <sup>a</sup>College of Chemistry and Chemical Engineering, Liaocheng University, Liaocheng, 252000,  
7    China.

- 8 **S1. The size distribution of  $\text{TiO}_2$  {001} in TCN-1;**
- 9 **S2. The TEM image of CN-200;**
- 10 **S3. The size distribution of CN-QD in TCN-3;**
- 11 **S4. The TEM image of pure g- $\text{C}_3\text{N}_4$  quantum dots (CN-QDs);**
- 12 **S5. The magnified FT-IR spectra of samples between 3000 and 3500  $\text{cm}^{-1}$ ;**
- 13 **S6. The size distribution of  $\text{TiO}_2$ {001} in TCN-2;**
- 14 **S7. The size distribution of  $\text{TiO}_2$ {001} in TCN-3;**
- 15 **S8. Comparison of the photocatalytic  $\text{H}_2$  evolution activity of the prepared TCN-**
- 16 **2 with that of photocatalysts in literature;**
- 17 **S9. The atomic content percent of Ti, O, C, N, F in the prepared samples;**
- 18 **S10. The average lifetime of charge carriers for the prepared samples;**
- 19 **S11. The size of (101) facets in the prepared samples calculated by the Scherrer**
- 20 **equation.**

21 **S1. The size distribution of  $\text{TiO}_2$  {001} in TCN-1**

22 According to the TEM image of Fig. 2(b), the size distribution of  $\text{TiO}_2$  {001}  
23 nanosheets in TCN-1 is shown in Fig. S1 (measured by Nano measure 1.2), and the  
24 mean diameter of the prepared  $\text{TiO}_2$  {001} nanosheets is 18 nm.

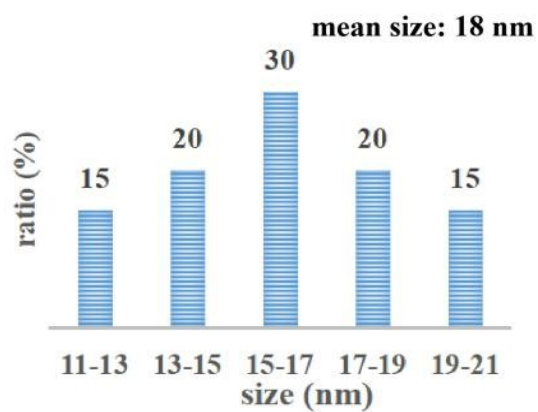

25  
26 **Fig. S1.** The size distribution of  $\text{TiO}_2$  {001} nanosheets in TCN-1 heterostructure.

27 **S2. The TEM image of CN-200**

28 To detect the effects of HF acid further, BCN was treated under the same condition  
29 with CNS-2 except without adding HF acid, the obtained sample was named as CN-  
30 200. It is apparent in Fig. S2 that the obtained CN-200 shows a typical layered structure  
31 with a large area.

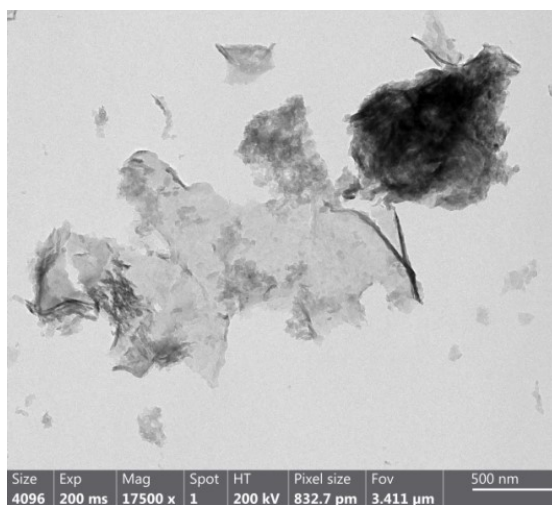

32  
33 **Fig. S2.** The TEM image of CN-200 prepared at the same condition with CNS-2  
34 except without adding HF acid.

### 35 S3. The size distribution of CN-QDs in TCN-3

36 According to the TEM image of Fig. 3(b), the size distribution of CN-QDs in  
37 TCN-3 is shown in Fig. S3(measured by Nanomeasure 1.2) and the mean diameter of  
38 the prepared CN-QDs is 3 nm.

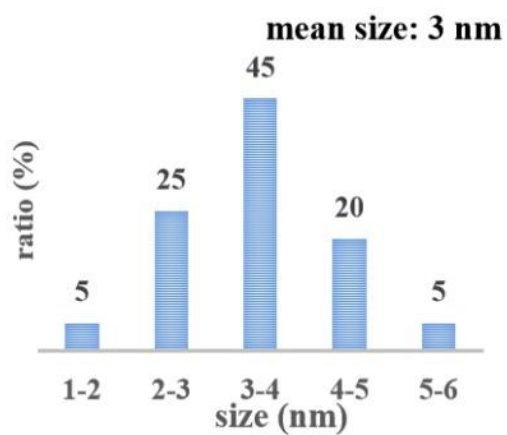

39  
40 **Fig. S3.** The size distribution of CN-QD in TCN-3 heterostructure.  
41

42 **S4. The TEM image of pure g-C<sub>3</sub>N<sub>4</sub> quantum dots (CN-QDs)**

43 As shown in Fig. S4, the pure CN-QDs has been synthesized at the same condition  
44 with TCN-3 except without adding the TBOT molecules.

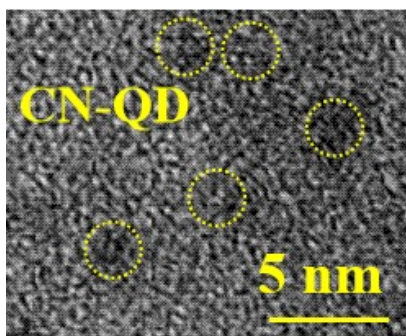

45

46 **Fig. S4.** The TEM image of pure g-C<sub>3</sub>N<sub>4</sub> quantum dots (CN-QDs) prepared at  
47 the same condition with TCN-3 except without adding the TBOT molecules.

48 **S5. The magnified FT-IR spectra of samples between 3000 and 3500  $\text{cm}^{-1}$**

49 According to magnified FT-IR spectra of samples between 3000 and 3500  $\text{cm}^{-1}$   
50 (shown in Fig. S5), the intensity of the characteristic vibration peaks between 3000 and  
51 3500  $\text{cm}^{-1}$  increases with the increasing of the synthetic temperature. The increased  
52 exposure of N-H group could be attributed to the increased break extent of C-N  
53 chemical bonds between the adjacent tri-s-triazine units under the enhanced synthetic  
54 temperature.

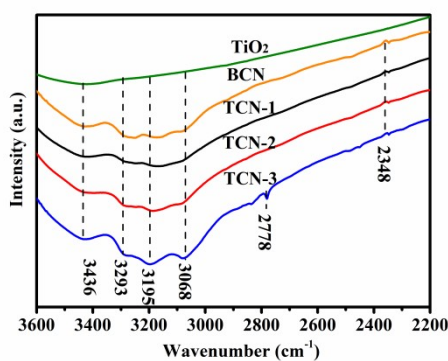

56 **Fig. S5.** The magnified FT-IR of prepared samples between 3000 and 3500  $\text{cm}^{-1}$ .

57 **S6. The size distribution of  $\text{TiO}_2\{001\}$  in TCN-2**

58 According to the TEM image of Fig. 3(b), the size distribution of  $\text{TiO}_2\{001\}$   
59 nanosheets in TCN-2 is shown in Fig. S6 (measured by Nano measure 1.2), and the  
60 mean diameter of the prepared  $\text{TiO}_2\{001\}$  nanosheets in TCN-2 is 20 nm.

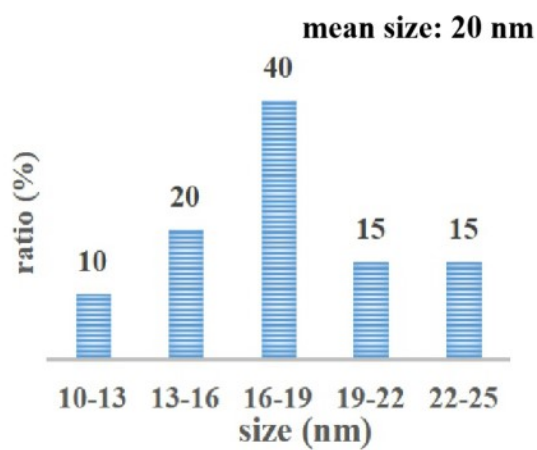

61

62 **Fig. S6.** The size distribution of  $\text{TiO}_2\{001\}$  nanosheets in TCN-2 heterostructure.



63 **S7. The size distribution of  $\text{TiO}_2\{001\}$  in TCN-3**

64 According to the TEM image of Fig. 4(a), the size distribution of  $\text{TiO}_2\{001\}$   
65 nanosheets in TCN-3 is shown in Fig. S7 (measured by Nano measure 1.2), and the  
66 mean diameter of the prepared  $\text{TiO}_2\{001\}$  nanosheets in TCN-3 is 23 nm.

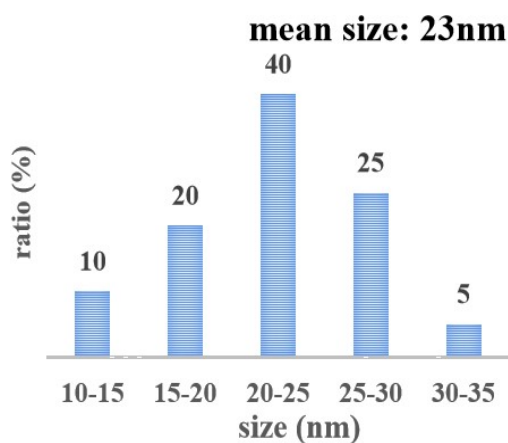

67

68 **Fig. S7.** The size distribution of  $\text{TiO}_2\{001\}$  nanosheets in TCN-3 heterostructure.

69 **S8. Comparison of the photocatalytic H<sub>2</sub> evolution activity of the prepared TCN-**  
70 **2 with that of photocatalysts in literature**

71 We also made a detailed comparison of the photocatalytic H<sub>2</sub> evolution activity of  
72 the prepared TCN with that of the photocatalysts prepared by other groups (shown in  
73 supporting information S8). Through extensive literature research, the intensify and  
74 wavelength of incident light, the distance between light source and reactor, and the  
75 addition amount of the co-catalyst are almost different, those are listed as follows  
76 (shown in Table. S1). Tan *et al.* synthesized the 3D/2D direct Z-scheme heterojunctions  
77 of hierarchical TiO<sub>2</sub> microflowers/g-C<sub>3</sub>N<sub>4</sub> nanosheets (TiO<sub>2</sub>/g-C<sub>3</sub>N<sub>4</sub>), and its  
78 photocatalytic activity of H<sub>2</sub> evolution was measured under the same condition with  
79 that of TCN-2 [16]. It is obvious that the prepared TCN-2 also exhibits an excellent  
80 activity of H<sub>2</sub> evolution than the TiO<sub>2</sub>/g-C<sub>3</sub>N<sub>4</sub> prepared by Tan group.

81 **Table. S1** Comparison of the photocatalytic H<sub>2</sub> evolution activity of the prepared  
82 TCN-2 with that of photocatalysts in literature

|                                                                     | Cocatalyst  | Light source | Highest activity<br>(mmol·h <sup>-1</sup> ·g <sup>-1</sup> ) | Ref. |
|---------------------------------------------------------------------|-------------|--------------|--------------------------------------------------------------|------|
| TiO <sub>2</sub> /g-C <sub>3</sub> N <sub>4</sub>                   | Pt (3 wt%.) | λ > 420 nm   | 0.513                                                        | [16] |
| Ti <sup>3+</sup> -TiO <sub>2</sub> /g-C <sub>3</sub> N <sub>4</sub> | Pt (1 wt%.) | λ > 420 nm   | 0.287                                                        | [59] |
| TiO <sub>2</sub> @g-C <sub>3</sub> N <sub>4</sub>                   | no          | AM 1.5       | 0.0079                                                       | [60] |
| C-dot/g-C <sub>3</sub> N <sub>4</sub> /TiO <sub>2</sub>             | no          | 350W Xe lamp | 0.01                                                         | [61] |

83

84 **S9. The atomic content percent of Ti, O, C, N, F in the prepared samples**

85 Table. S2 shows the atomic content percent of Ti, O, C, N, F in the prepared  
 86 samples measured by XPS. It is apparent in Table S2 that the content ratio of g-C<sub>3</sub>N<sub>4</sub> in  
 87 the prepared TCN heterostructures decreases with the increased of the synthetic  
 88 temperature.

89 **Table. S2** The atomic content percent of Ti, O, C, N, F in the prepared samples

|              | <b>Ti2p</b> | <b>O1s</b> | <b>C1s</b> | <b>N1s</b> | <b>F1s</b> |
|--------------|-------------|------------|------------|------------|------------|
| <b>TCN-1</b> | 8.92        | 17.55      | 30.45      | 36.96      | 6.12       |
| <b>TCN-2</b> | 10.04       | 18.98      | 28.86      | 35.05      | 7.07       |
| <b>TCN-3</b> | 10.69       | 22.66      | 24.7       | 34.4       | 7.55       |

90

91 **S10. The average lifetime of charge carriers for the prepared samples.**

92 The curves of time-resolved photoluminescence decay spectra in Fig. 10 (b) were fitted  
 93 with the ExpDec2 (using the Origin software), respectively, and the obtained  $A_1$ ,  $t_1$ ,  $A_2$ ,  
 94  $t_2$  are shown in Table. S3. The average lifetime of charge carriers for the prepared  
 95 samples was calculated according to the equation as follows, and the results are  
 96 summarized in Table S3.

$$\tau_{ave} = \frac{A_1 * t_1^2 + A_2 * t_2^2}{A_1 * t_1 + A_2 * t_2}$$

98 **Table. S3** The average lifetime of charge carriers for the prepared samples.

| Samples              | TiO <sub>2</sub> | BCN      | TCN-1    | TCN-2    | TCN-3    |
|----------------------|------------------|----------|----------|----------|----------|
| <b>A<sub>1</sub></b> | 1928.296         | 42.13017 | 39.43025 | 30.17187 | 31.94815 |
| <b>t<sub>1</sub></b> | 1.13401          | 15.21908 | 18.08065 | 22.61286 | 19.86034 |
| <b>A<sub>2</sub></b> | -957.757         | 1043.979 | 1085.576 | 1092.91  | 1056.961 |
| <b>t<sub>2</sub></b> | 0.46347          | 1.24002  | 1.41067  | 1.48712  | 1.33039  |
| <b>Lifetime (ns)</b> | 1.305            | 5.870    | 6.706    | 7.733    | 7.092    |

99

100 **S11. The size of (101) facets in the prepared samples calculated by the Scherrer**  
101 **equation.**

102 The FWHM of TiO<sub>2</sub> (101) facet in the prepared TCN-1, TCN-2 and TCN-3  
103 heterostructures were measured to be 0.89°, 0.75° and 0.63°, respectively. And the sizes  
104 of (101) facets in the TCN-1, TCN-2 and TCN-3 heterostructures could be calculated  
105 by the Scherrer equation:

$$106 \quad D = 0.89 \lambda / (B * \cos\theta)$$

107 (D is the size of the specific plane, the unit is nm;  $\lambda$  is the wavelength of the incident  
108 wave, 0.154056 nm; B is the FWHM, the unit is rad;  $\theta$  is the angle of incidence).

109 According to the above equation, the size of (101) facets in the prepared TCN-1, TCN-2  
110 and TCN-3 are 8.06 nm, 9.07 nm and 10.74 nm, respectively. Therefore, the size of  
111 (101) facets in the prepared samples increases with the increase of the synthetic  
112 temperature. And this tendency is consistent with the results of TEM images.
